# Supplementary material
Source: MDPI journal article supplement (https://www.mdpi.com/2073-4395/14/3/612)
Supplement: s1 [file s1]

# Evaluation of Potato Fertilization and the Potential of Farmers to Reduce the Amount of FertilizerBased on Yield and the Requirements for Nutrients

**Yayi Wang** <sup>1,2fj</sup>, **Rong Zhang** <sup>2fj</sup>, **Songling Li** <sup>2</sup>, **Xinnian Guo** <sup>3</sup>, **Quanhui Li** <sup>2</sup>, **Xiaoli Hui** <sup>1</sup>, **Zhaohui Wang**<sup>1,4\*</sup>and **Huixia Wang** <sup>5</sup>

<sup>1</sup> College of Natural Resources and Environment, Northwest A&F University, Yangling 712100, Shaanxi, China

<sup>2</sup> Academy of Agriculture and Forestry Sciences, Qinghai University, Xining 810016, China

<sup>3</sup> Institute of Agricultural Resources and Environment/Ningxia Academy of Agriculture and Forestry Sciences, Yinchuan 750002, Ningxia, China

<sup>4</sup> State Key Laboratory of Crop Stress Biology for Arid Areas, Northwest A&F University, Yangling 712100, Shaanxi, China

<sup>5</sup> Rural Industry Development Guidance Center of Qinghai Province, Xining 810016, China

\* Correspondence: w-zhaohui@263.net

fj These authors contributed equally to this work.

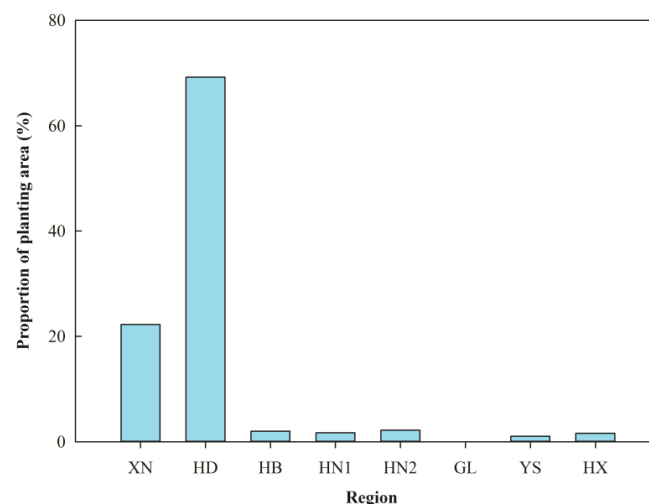

**Figure S1.** Distribution of potatoes in Qinghai Province.XN stands for Xining City, HD for Haidong City, HB for Haibei State, HN1 for Huangnan State, HN2 for Hainan State, GL for Guoluo State, YS for Yushu State, and HX for Haixi State.

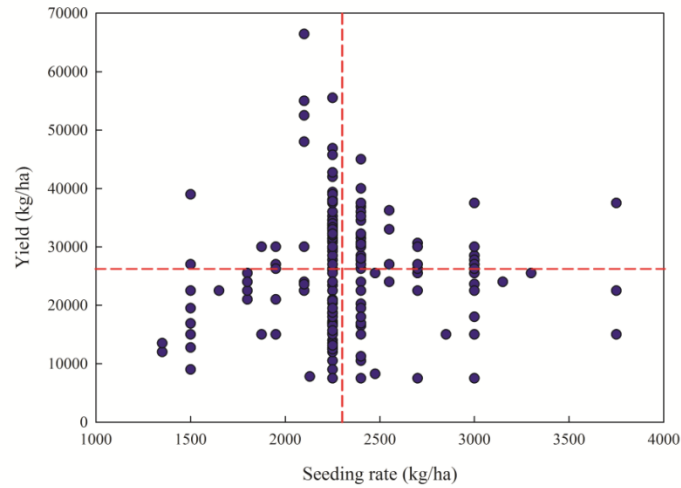

**Figure S2.** Seeding rate in Haidong City.

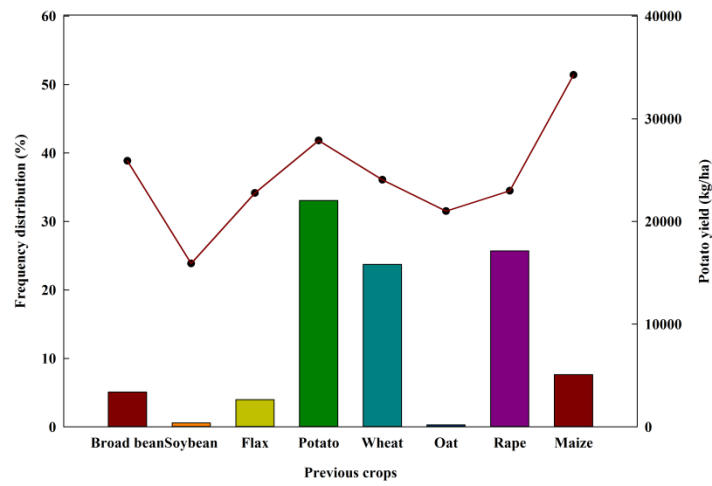

**Figure S3.** Proportion of previous crop and potato yield after rotation in Haidong City.

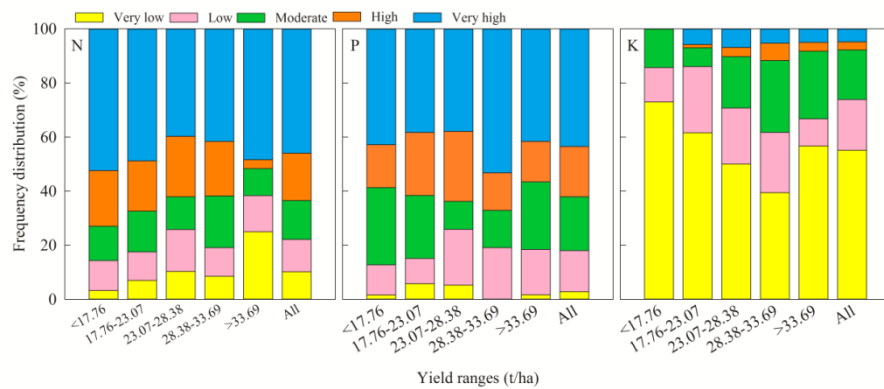

**Figure S4.** Relationships of potato yield to N, P<sub>2</sub>O<sub>5</sub>, and K<sub>2</sub>O fertilizers.

**Table S1.** Nutrient requirements, yield and amount of fertilizer of the different potato varieties

| Variety      | Yield<br>(kg ha <sup>-1</sup> ) | Nutrient requirements<br>(kg t <sup>-1</sup> ) |                               |                  | Nutrient uptake<br>(kg ha <sup>-1</sup> ) |                               |                  | Fertilization rate<br>(kg ha <sup>-1</sup> ) |                               |                  |
|--------------|---------------------------------|------------------------------------------------|-------------------------------|------------------|-------------------------------------------|-------------------------------|------------------|----------------------------------------------|-------------------------------|------------------|
|              |                                 | N                                              | P <sub>2</sub> O <sub>5</sub> | K <sub>2</sub> O | N                                         | P <sub>2</sub> O <sub>5</sub> | K <sub>2</sub> O | N                                            | P <sub>2</sub> O <sub>5</sub> | K <sub>2</sub> O |
| Buerbanke    | 22,888                          | 1.67                                           | 2.81                          | 8.16             | 38.8                                      | 64.9                          | 188              | 90                                           | 90                            | 128              |
| Chuanyu 117  | 21,875                          | 4.44                                           | 0.93                          | 5.96             | 87.6                                      | 17.0                          | 117              | 95                                           | 47                            | 95               |
| Chuanyuzao   | 23,199                          | 1.74                                           | 1.01                          | 3.19             | 41.1                                      | 23.3                          | 74.8             | 48                                           | 24                            | 72               |
| Daxiyang     | 24,381                          | 1.69                                           | 1.16                          | 4.11             | 41.7                                      | 28.4                          | 102              | 64                                           | 42                            | 0                |
| Dingshu No.2 | 26,247                          | 2.22                                           | 1.24                          | 4.73             | 58.6                                      | 32.9                          | 125              | 231                                          | 97                            | 32               |
| Jingshi No.2 | 14,070                          | 3.35                                           | 1.00                          | 3.83             | 47.3                                      | 14.2                          | 53.8             | 180                                          | 90                            | 90               |
| Kexin No.1   | 42,465                          | 5.55                                           | 1.76                          | 6.61             | 224                                       | 62.4                          | 268              | 230                                          | 110                           | 193              |
| LongshuNo.1  | 29,479                          | 3.78                                           | 0.77                          | 4.70             | 101                                       | 21.1                          | 129              | 157                                          | 70                            | 34               |
| LeshuNo.1    | 27,025                          | 4.60                                           | 1.04                          | 3.86             | 95.8                                      | 21.8                          | 82.1             | 134                                          | 116                           | 108              |
| MinshuNo.1   | 22,614                          | 4.42                                           | 3.14                          | 12.90            | 95.3                                      | 61.9                          | 250              | 122                                          | 122                           | 66               |
| QingshuNo.1  | 21,395                          | 7.53                                           | 3.63                          | 15.1             | 160                                       | 76.7                          | 320              | 169                                          | 120                           | 90               |
| Xindaping    | 32,370                          | 3.12                                           | 1.50                          | 5.01             | 102                                       | 48.8                          | 162              | 231                                          | 97                            | 32               |
| Zihuabai     | 18,795                          | 4.68                                           | 1.24                          | 5.06             | 43.5                                      | 46.4                          | 69.6             | 70                                           | 40                            | 27               |

**Table S2.** The status of N fertilization by farmers and its recommended rate

| Yield ranges<br>(kg ha <sup>-1</sup> ) | Very low(kg Nha <sup>-1</sup> ) |     |         |     | Low(kg Nha <sup>-1</sup> ) |     |         |     | Moderate(kg Nha <sup>-1</sup> ) |     |         |     | High(kg Nha <sup>-1</sup> ) |     |     |    | Very high(kg Nha <sup>-1</sup> ) |     |     |    | Mean(kg Nha <sup>-1</sup> ) |     |     |    |
|----------------------------------------|---------------------------------|-----|---------|-----|----------------------------|-----|---------|-----|---------------------------------|-----|---------|-----|-----------------------------|-----|-----|----|----------------------------------|-----|-----|----|-----------------------------|-----|-----|----|
|                                        | F                               | RR  | R       | E%  | F                          | RR  | R       | E%  | F                               | RR  | R       | E%  | F                           | RR  | R   | E% | F                                | RR  | R   | E% | F                           | RR  | R   | E% |
| Very low<br><17,760                    | 99                              | 58  | 41      | 41  | 136                        | 62  | 74      | 55  | 164                             | 77  | 87      | 53  | 194                         | 59  | 135 | 70 | 287                              | 67  | 220 | 76 | 229                         | 66  | 164 | 71 |
| Low<br>17,760-23,070                   | 94                              | 95  | -2      | -2  | 134                        | 98  | 36      | 27  | 161                             | 102 | 59      | 37  | 196                         | 104 | 92  | 47 | 276                              | 101 | 175 | 63 | 215                         | 101 | 115 | 53 |
| Moderate<br>23,070-28,380              | 100                             | 126 | -<br>26 | -26 | 137                        | 124 | 12      | 9   | 166                             | 126 | 40      | 24  | 191                         | 127 | 64  | 34 | 291                              | 125 | 167 | 57 | 210                         | 125 | 85  | 40 |
| High<br>28,380-33,690                  | 96                              | 153 | -<br>57 | -60 | 137                        | 151 | 14      | 10  | 166                             | 149 | 17      | 10  | 192                         | 150 | 42  | 22 | 276                              | 150 | 126 | 46 | 208                         | 150 | 58  | 28 |
| Very high<br>>33,690                   | 100                             | 199 | -<br>99 | -99 | 137                        | 204 | -<br>67 | -49 | 169                             | 194 | -<br>26 | -15 | 209                         | 178 | 30  | 15 | 284                              | 182 | 102 | 36 | 204                         | 190 | 14  | 7  |
| Mean                                   | 98                              | 153 | -<br>55 | -55 | 136                        | 130 | 6       | 5   | 165                             | 128 | 37      | 22  | 194                         | 115 | 78  | 40 | 282                              | 123 | 158 | 56 | 213                         | 126 | 87  | 41 |

Note: F: Fertilizer rate used by farmers;RR: Recommended rate;R: Rec minus F;E %: The extent of reduction; N: nitrogen.

**Table S3.** The status of P fertilization by farmers and its recommended rate

| Yield ranges (kg ha <sup>-1</sup> ) | Very low<br>(kg P <sub>2</sub> O <sub>5</sub> ha <sup>-1</sup> ) |    |     |     | Low<br>(kg P <sub>2</sub> O <sub>5</sub> ha <sup>-1</sup> ) |     |     |     | Moderate<br>(kg P <sub>2</sub> O <sub>5</sub> ha <sup>-1</sup> ) |    |     |    | High<br>(kg P <sub>2</sub> O <sub>5</sub> ha <sup>-1</sup> ) |    |     |    | Very high<br>(kg P <sub>2</sub> O <sub>5</sub> ha <sup>-1</sup> ) |    |     |    | Mean<br>(kg P <sub>2</sub> O <sub>5</sub> ha <sup>-1</sup> ) |    |     |     |
|-------------------------------------|------------------------------------------------------------------|----|-----|-----|-------------------------------------------------------------|-----|-----|-----|------------------------------------------------------------------|----|-----|----|--------------------------------------------------------------|----|-----|----|-------------------------------------------------------------------|----|-----|----|--------------------------------------------------------------|----|-----|-----|
|                                     | F                                                                | RR | R   | E%  | F                                                           | RR  | R   | E%  | F                                                                | RR | R   | E% | F                                                            | RR | R   | E% | F                                                                 | RR | R   | E% | F                                                            | RR | R   | E%  |
| Very low<br><17,760                 | 45                                                               | 21 | 24  | 54  | 95                                                          | 18  | 77  | 81  | 130                                                              | 18 | 112 | 86 | 176                                                          | 17 | 159 | 90 | 285                                                               | 19 | 265 | 93 | 198                                                          | 18 | 180 | 91  |
| Low<br>17,760-23,070                | 25                                                               | 28 | -3  | -14 | 98                                                          | 26  | 73  | 74  | 131                                                              | 29 | 102 | 78 | 170                                                          | 29 | 142 | 83 | 277                                                               | 29 | 248 | 90 | 188                                                          | 28 | 159 | 85  |
| Moderate<br>23,070-28,380           | 25                                                               | 34 |     | -34 | 36                                                          | 37  | -1  | -3  | -                                                                | -  | -   | -  | -                                                            | -  | -   | -  | -                                                                 | -  | -   | -  | 28                                                           | 35 | -7  | -24 |
| High<br>28,380-33,690               | -                                                                | -  | -   | -   | 92                                                          | 154 | -61 | -66 | 137                                                              | 43 | 94  | 69 | 176                                                          | 41 | 135 | 77 | 288                                                               | 42 | 246 | 86 | 214                                                          | 42 | 172 | 80  |
| Very high<br>>33,690                | 0                                                                | 51 | -51 | -   | 97                                                          | 58  | 39  | 40  | 135                                                              | 54 | 81  | 60 | 175                                                          | 55 | 120 | 68 | 327                                                               | 50 | 276 | 85 | 212                                                          | 53 | 159 | 75  |
| Mean                                | 25                                                               | 32 | -7  | -28 | 94                                                          | 39  | 54  | 58  | 133                                                              | 34 | 98  | 74 | 174                                                          | 34 | 139 | 80 | 292                                                               | 36 | 256 | 88 | 202                                                          | 35 | 167 | 82  |

Note: P: phosphorus; P<sub>2</sub>O<sub>5</sub>: phosphorus pentoxide; F: Fertilizer rate used by farmers; RR: Recommended rate; R: Rec minus F; E %: The extent of reduction; -: No data.

**Table S4.** The status of K fertilization by farmers and its recommended rate

| Yield ranges (kg ha <sup>-1</sup> ) | Very low (kg K <sub>2</sub> O ha <sup>-1</sup> ) |     |      |       | Low (kg K <sub>2</sub> O ha <sup>-1</sup> ) |     |      |      | Moderate (kg K <sub>2</sub> O ha <sup>-1</sup> ) |     |      |      | High (kg K <sub>2</sub> O ha <sup>-1</sup> ) |     |      |     | Very high (kg K <sub>2</sub> O ha <sup>-1</sup> ) |     |     |     | Mean (kg K <sub>2</sub> O ha <sup>-1</sup> ) |     |      |      |
|-------------------------------------|--------------------------------------------------|-----|------|-------|---------------------------------------------|-----|------|------|--------------------------------------------------|-----|------|------|----------------------------------------------|-----|------|-----|---------------------------------------------------|-----|-----|-----|----------------------------------------------|-----|------|------|
|                                     | F                                                | RR  | R    | E%    | F                                           | RR  | R    | E%   | F                                                | RR  | R    | E%   | F                                            | RR  | R    | E%  | F                                                 | RR  | R   | E%  | F                                            | RR  | R    | E%   |
| Very low<br><17,760                 | 9                                                | 93  | -85  | -973  | 49                                          | 100 | -51  | -104 | 78                                               | 97  | -19  | -25  | -                                            | -   | -    | -   | -                                                 | -   | -   | -   | 24                                           | 95  | -71  | -299 |
| Low<br>17,760-23,070                | 9                                                | 144 | -135 | -1497 | 43                                          | 146 | -103 | -236 | 84                                               | 147 | -63  | -76  | 150                                          | 157 | -7   | -5  | 234                                               | 157 | 77  | 33  | 38                                           | 145 | -108 | -286 |
| Moderate<br>23,070-28,380           | 14                                               | 179 | -165 | -1211 | 41                                          | 182 | -141 | -345 | 84                                               | 182 | -98  | -116 | 128                                          | 188 | -61  | -48 | 182                                               | 181 | 1   | 0   | 48                                           | 180 | -132 | -275 |
| High<br>28,380-33,690               | 9                                                | 218 | -209 | -2431 | 52                                          | 212 | -160 | -308 | 91                                               | 220 | -129 | -142 | 140                                          | 213 | -73  | -52 | 187                                               | 211 | -24 | -13 | 57                                           | 216 | -160 | -282 |
| Very high<br>>33,690                | 7                                                | 281 | -273 | -3716 | 42                                          | 287 | -245 | -582 | 90                                               | 256 | -167 | -186 | 150                                          | 260 | -110 | -73 | 233                                               | 263 | -30 | -13 | 44                                           | 274 | -230 | -519 |
| Mean                                | 9                                                | 174 | -165 | -1786 | 46                                          | 180 | -134 | -289 | 87                                               | 198 | -111 | -128 | 140                                          | 212 | -71  | -51 | 207                                               | 192 | 15  | 7   | 43                                           | 182 | -139 | -323 |

Note: F: Fertilizer rate used by farmers;RR: Recommended rate;R: Rec minus F;E %: The extent of reduction; K: potassium; K<sub>2</sub>O, potassium oxide.
